# Supplementary material
Source: PubMed Central journal article supplement (PMC3217321)
Supplement: figS1.pdf [file figS1.pdf]

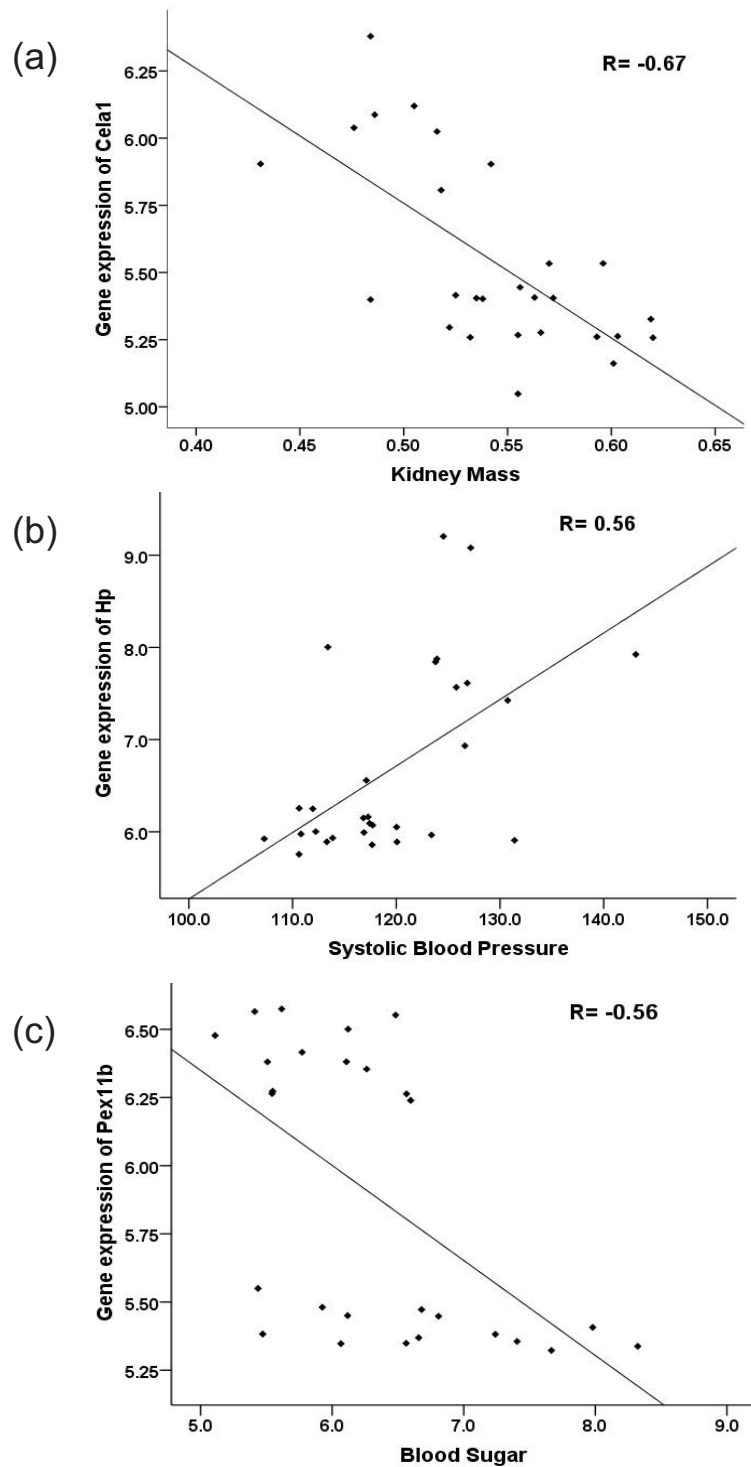

**Supplementary Figure 1:** Scatterplots of expression against physiological trait for prioritised, qPCR validated *cis*-eQTL genes with transcripts showing strong Pearson correlation coefficients for the respective traits are shown by an asterisk ((a) *Celal* ( $p=0.0001$ ); (b) *Hp* ( $p= 0.001$ ); (c) *Pex11b* ( $p=0.002$ )).
